# Supplementary figures and images for: Operando monitoring of gas bubble evolution in water electrolysis by single high-frequency impedance
Source: Royal Society of Chemistry journal article supplement (doi:10.1039/d3ey00182b), 2023-01-01

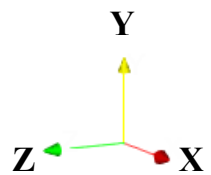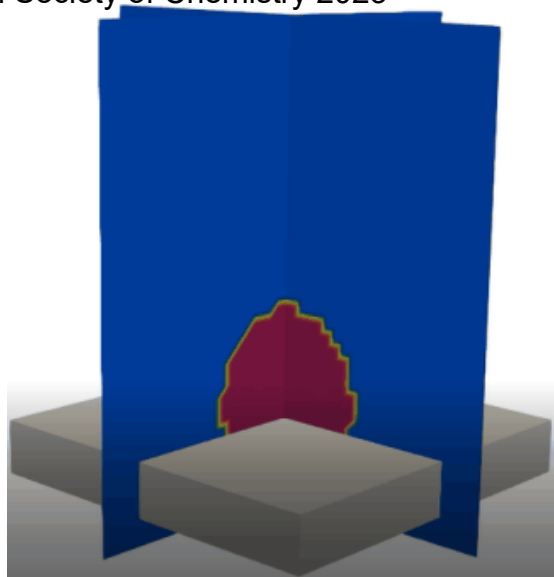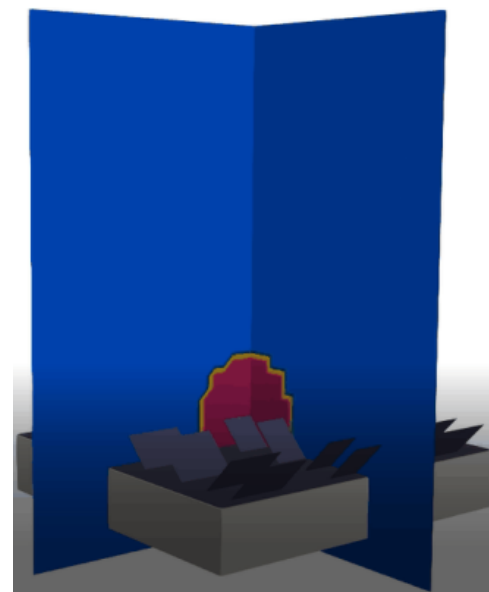

Normalized density

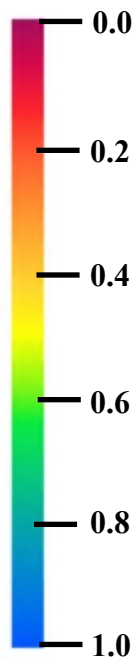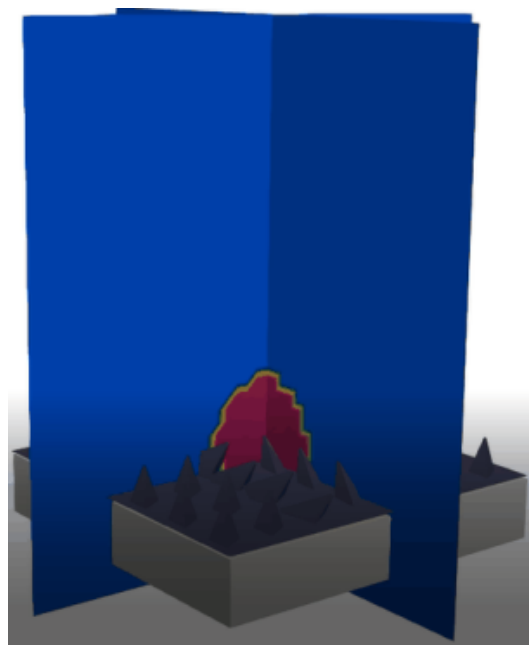

Supplement: d3ey00182b1.pdf [file d3ey00182b1.pdf]
